# Supplementary material
Source: publisher site journal article supplement (https://spandidos-publications.com/6260/downloadSupplementary)
Supplement: Supplementary file 1 [file downloadSupplementary]

U87MG is a human glioblastoma cell line, and genes associated with the characteristics of glioblastoma are typically expressed in U87MG. Here are some genes that may be expressed in U87MG and are relevant to glioblastoma:

1. EGFR (Epidermal Growth Factor Receptor): expression of EGFR is common in glioblastomas, and U87MG usually exhibits EGFR expression.
2. TP53: TP53, the encoding gene for the tumor suppressor p53, is associated with the development of various tumors, including glioblastoma.
3. PTEN (Phosphatase and Tensin Homolog): PTEN, a tumor suppressor gene, is implicated in the occurrence and progression of glioblastoma.
4. PDGFRA (Platelet-Derived Growth Factor Receptor Alpha): PDGFRA, a receptor tyrosine kinase associated with the PDGF signaling pathway, may be expressed in U87MG.
5. IDH1 (Isocitrate Dehydrogenase 1): IDH1 are associated with certain subtypes of glioblastoma, and examining its expression can provide insights into the genetic characteristics of U87MG.
6. NF1 (Neurofibromin 1): NF1, related to neurofibromatosis 1, is implicated in the development of some glioblastomas.
7. AURKA (Aurora Kinase A): AURKA, a kinase involved in cell division and tumorigenesis, may be expressed in U87MG.
8. MGMT (O-6-methylguanine-DNA methyltransferase): U87MG is an MGMT-deficient GBM cell line.

The expression levels of these genes are analyzed through RNA sequencing to ensure that the expression profile of U87MG aligns with the characteristics of glioblastoma.

*RNA sequencing.* Total RNA extraction was performed using the REzol reagent supplied by Protech Technology Enterprise CO., Ltd (Taipei, Taiwan). The subsequent steps of library construction and sequencing were conducted by Genomics Co., Ltd. (New Taipei City, Taiwan), utilizing the Illumina HiSeq/NovaSeq platform. This resulted in the generation of 150 bp paired-end reads, capturing comprehensive transcriptomic information. To ensure accurate quantification, Transcript Per Million (TPM) values were calculated during the analysis.

Results

|                 |        |                                               | Transcripts Per Million (TPM) |          |          |          |
|-----------------|--------|-----------------------------------------------|-------------------------------|----------|----------|----------|
|                 |        |                                               | TPM1                          | TPM2     | TPM3     | Average  |
| ENSG00000146648 | EGFR   | Epidermal growth factor receptor              | 38.1846                       | 40.25736 | 29.78464 | 36.07554 |
| ENSG00000141510 | TP53   | Tumor protein p53                             | 20.5516                       | 14.21886 | 16.99154 | 17.254   |
| ENSG00000171862 | PTEN   | Phosphatase and tensin homolog                | 34.50758                      | 49.29042 | 43.01516 | 42.27105 |
| ENSG00000134853 | PDGFRA | Platelet derived growth factor receptor alpha | 2.287705                      | 2.347327 | 2.176315 | 2.270449 |
| ENSG00000138413 | IDH1   | Isocitrate dehydrogenase [NADP(+)] 1          | 306.2815                      | 175.1774 | 165.2801 | 215.5797 |
| ENSG00000196712 | NF1    | Neurofibromin 1                               | 13.31974                      | 14.67775 | 9.224683 | 12.40739 |
| ENSG00000087586 | AURKA  | Aurora kinase A                               | 81.88235                      | 115.5409 | 113.5828 | 103.6687 |
| ENSG00000170430 | MGMT   | O-6-methylguanine-DNA Methyltransferase       | 0                             | 0        | 0        | 0        |
